# Supplementary material for: Anion-Induced Structural Diversity and Optical Chromism in a Series of Cyano-Bridged Heterometallic 3d-4f Coordination Polymers
Source: MDPI journal article supplement (doi:10.3390/molecules28062871), 2023-03-22
Supplement: s1 [file s1]

# Anion-induced Structural Diversity and Optical Chromism in a Series of Cyano-bridged Heterometallic $3d-4f$ Coordination Polymers

Flavia Artizzu, Luca Pilia, Angela Serpe, Dimitrije Mara, Maria Francesca Casula, Luciano Marchiò and Paola Deplano

## Supporting Information

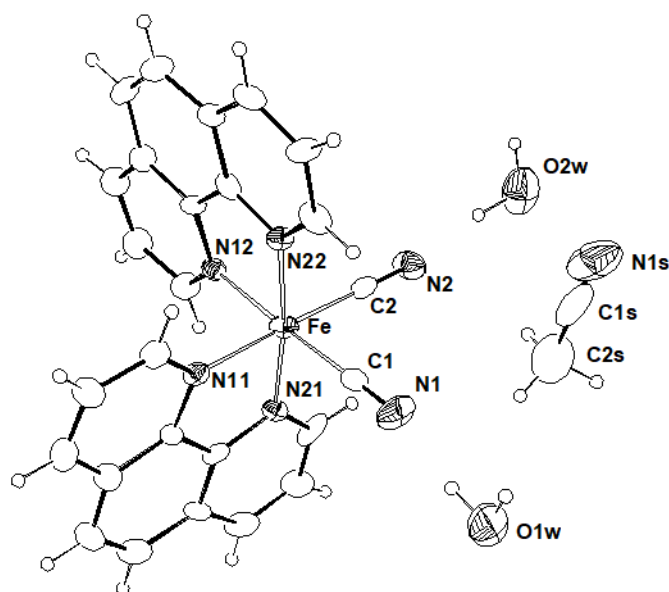

**Figure S1.** Ortep drawing of  $[\text{Fe}(\text{Phen})_2(\text{CN})_2] \cdot 2\text{H}_2\text{O} \cdot \text{CH}_3\text{CN}$ . Ellipsoids are drawn at 30% probability level.

**Table S1.** Summary of X-ray crystallographic data for [Fe(Phen)<sub>2</sub>(CN)<sub>2</sub>]<sub>2</sub>H<sub>2</sub>O·CH<sub>3</sub>CN.

|                                  |                                                                 |
|----------------------------------|-----------------------------------------------------------------|
| Empirical formula                | C <sub>28</sub> H <sub>23</sub> FeN <sub>7</sub> O <sub>2</sub> |
| Formula weight                   | 545.38                                                          |
| Colour, habit                    | Prisms, purple                                                  |
| Crystal size, mm                 | 0.10×0.08×0.05                                                  |
| Crystal system                   | Triclinic                                                       |
| Space group                      | <i>P</i> -1                                                     |
| <i>a</i> , Å                     | 10.266(4)                                                       |
| <i>b</i> , Å                     | 10.396(4)                                                       |
| <i>c</i> , Å                     | 12.107(4)                                                       |
| $\alpha$ , deg.                  | 80.92(1)                                                        |
| $\beta$ , deg.                   | 78.75(1)                                                        |
| $\gamma$ , deg.                  | 87.07(1)                                                        |
| <i>V</i> , Å <sup>3</sup>        | 1251.1(8)                                                       |
| <i>Z</i>                         | 2                                                               |
| <i>T</i> , K                     | 293(2)                                                          |
| $\rho$ (calc), Mg/m <sup>3</sup> | 1.448                                                           |
| $\mu$ , mm <sup>-1</sup>         | 0.644                                                           |
| $\theta$ range, deg.             | 1.73 to 24.04                                                   |
| No. of rflcn/obsv                | 39388 / 5692                                                    |
| GooF                             | 0.892                                                           |
| <i>R</i> 1                       | 0.0555                                                          |
| <i>wR</i> 2                      | 0.0584                                                          |

$$R1 = \frac{\sum ||F_o| - |F_c||}{\sum |F_o|}, wR2 = \frac{[\sum [w(F_o^2 - F_c^2)^2] / \sum [w(F_o^2)^2]]^{1/2}}{w}, w = 1 / [\sigma^2(F_o^2) + (aP)^2 + bP], \text{ where } P = [\max(F_o^2, 0) + 2F_c^2] / 3$$

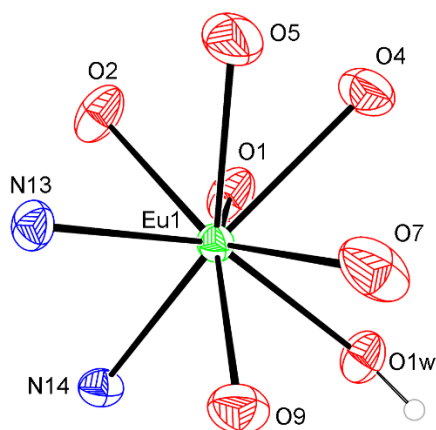**Figure S2.** Capped square anti-prism geometry of the lanthanide ion in 1-Eu. The square faces are represented by O(2)-O(4)-N(14)-O1w and by O(5)-O(7)-N(13)-O(9); O(1) is capping the former face.

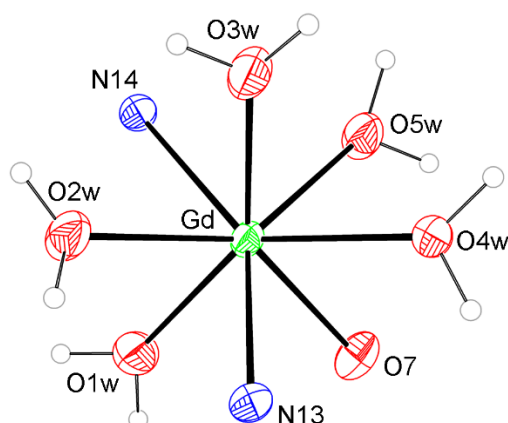

**Figure S3.** Square anti-prism geometry of the lanthanide ion in **2-Gd**. The square faces are represented by O1w-N(14)-O5w-O(7) and by O2w-O3w-O4w-N(13).

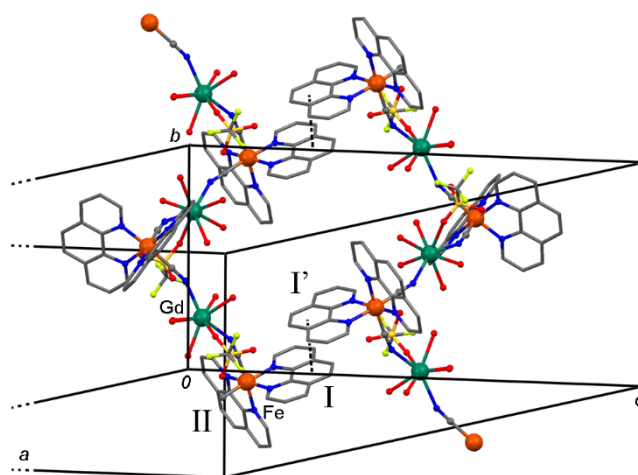

**Figure S4.** Portion of the crystal packing of **2-Eu**. Only the coordination environment of the metal is reported for clarity. The  $\pi$ -stacking between **I** phenanthroline rings are reported as dashed bonds. Symmetry code ' =  $\frac{1}{2}-x$ ;  $\frac{1}{2}-y$ ;  $1-z$ .

**Table S2.** Selected bond lengths (Å) and angles (°) for **1-Eu** and **1-Er**.

|              |           |                     |          |
|--------------|-----------|---------------------|----------|
| <b>1-Eu</b>  |           |                     |          |
| Eu(1)-O(1)   | 2.538(2)  | N(14)-Eu(1)-O(1)    | 75.03(8) |
| Eu(1)-O(2)   | 2.508(2)  | N(14)-Eu(1)-O1w     | 78.68(9) |
| Eu(1)-O(4)   | 2.469(2)  | O(1)-Eu(1)-O1w      | 70.09(8) |
| Eu(1)-O(5)   | 2.498(2)  | N(13)-Eu(1)-O(5)    | 74.98(9) |
| Eu(1)-O(7)   | 2.480(3)  | N(14)-Eu(1)-N(13)   | 83.05(8) |
| Eu(1)-O(9)   | 2.470(3)  | O(1)-Eu(1)-O(5)     | 102.1(1) |
| Eu(1)-O1w    | 2.432(2)  | O1w-Eu(1)-O(7)      | 75.8(1)  |
| Eu(1)-N(13)  | 2.429(3)  | N(13)-Eu(1)-O(2)    | 79.68(8) |
| Eu(1)-N(14)  | 2.482(2)  | O(2)-Eu(1)-O(5)     | 74.7(1)  |
| Fe(2)-N(11)  | 1.970(2)  | O(5)-Eu(1)-O(4)     | 50.51(9) |
| Fe(2)-N(21)  | 1.996(2)  | O(4)-Eu(1)-O(7)     | 70.92(9) |
| Fe(2)-N(12)  | 2.018(2)  | O1w-Eu(1)-O(9)      | 79.80(9) |
| Fe(2)-N(22)  | 1.976(2)  | O(9)-Eu(1)-N(14)    | 89.23(8) |
| Fe(2)-C(14)  | 1.911(3)  | N(11)-Fe(2)-C(14)   | 94.4(1)  |
| Fe(2)-C(13)' | 1.901(3)  | N(11)-Fe(2)-C(13)'  | 92.6(1)  |
| Eu(1)-Fe(2)  | 5.5176(7) | N(22)-Fe(2)-C(14)   | 93.5(1)  |
| Eu(1)-Fe(2)' | 5.406(1)  | N(22)-Fe(2)-C(13)'  | 91.4(1)  |
|              |           | N(12)-Fe(2)-C(13)'  | 91.9(1)  |
|              |           | N(21)-Fe(2)-C(14)   | 89.3(1)  |
|              |           | N(14)-C(14)-Fe(2)   | 176.7(3) |
|              |           | N(13)'-C(13)'-Fe(2) | 175.9(3) |
|              |           | C(14)-N(14)-Eu(1)   | 169.4(2) |
|              |           | C(13)-N(13)-Eu(1)   | 164.3(2) |
| <b>1-Er</b>  |           |                     |          |
| Er(1)-O(1)   | 2.51(1)   | N(14)-Er(1)-O(1)    | 74.7(4)  |
| Er(1)-O(2)   | 2.45(1)   | N(14)-Er(1)-O1w     | 79.1(4)  |
| Er(1)-O(4)   | 2.41(1)   | O(1)-Er(1)-O1w      | 69.8(4)  |
| Er(1)-O(5)   | 2.44(1)   | N(13)-Er(1)-O(5)    | 74.6(4)  |
| Er(1)-O(7)   | 2.43(1)   | N(14)-Er(1)-N(13)   | 82.2(4)  |
| Er(1)-O(9)   | 2.41(1)   | O(1)-Er(1)-O(5)     | 103.2(4) |
| Er(1)-O1w    | 2.36(1)   | O1w-Er(1)-O(7)      | 76.3(4)  |
| Er(1)-N(13)  | 2.37(1)   | N(13)-Er(1)-O(2)    | 79.0(3)  |
| Er(1)-N(14)  | 2.42(1)   | O(2)-Er(1)-O(5)     | 73.9(5)  |
| Fe(2)-N(11)  | 1.97(1)   | O(5)-Er(1)-O(4)     | 51.7(3)  |
| Fe(2)-N(21)  | 2.00(1)   | O(4)-Er(1)-O(7)     | 71.0(3)  |
| Fe(2)-N(12)  | 2.03(1)   | O1w-Er(1)-O(9)      | 79.6(5)  |
| Fe(2)-N(22)  | 1.98(1)   | O(9)-Er(1)-N(14)    | 82.8(3)  |
| Fe(2)-C(14)  | 1.93(1)   | N(11)-Fe(2)-C(14)   | 94.9(4)  |
| Fe(2)-C(13)' | 1.91(1)   | N(11)-Fe(2)-C(13)'  | 92.4(6)  |
| Er(1)-Fe(2)  | 5.47(1)   | N(22)-Fe(2)-C(14)   | 93.7(4)  |
| Er(1)-Fe(2)' | 5.36(1)   | N(22)-Fe(2)-C(13)'  | 92.1(6)  |
|              |           | N(12)-Fe(2)-C(13)'  | 92.5(4)  |
|              |           | N(21)-Fe(2)-C(14)   | 88.8(4)  |

|                     |          |
|---------------------|----------|
| N(14)-C(14)-Fe(2)   | 177(1)   |
| N(13)'-C(13)'-Fe(2) | 175.3(9) |
| C(14)-N(14)-Er(1)   | 169.0(9) |
| C(13)-N(13)-Er(1)   | 166.0(8) |

' = -x; -y; 1-z

**Table S3.** Selected bond lengths (Å) and angles (°) for **2-Ln**.

|             |           |                  |           |
|-------------|-----------|------------------|-----------|
| <b>2-Gd</b> |           |                  |           |
| Gd-O1w      | 2.391(3)  | O1w-Gd-O2w       | 76.4(1)   |
| Gd-O2w      | 2.404(3)  | O2w-Gd-N(14)     | 76.51(9)  |
| Gd-O3w      | 2.398(3)  | N(14)-Gd-O3w     | 78.6(1)   |
| Gd-O4w      | 2.456(3)  | O3w-Gd-O5w       | 84.1(1)   |
| Gd-O5w      | 2.389(3)  | O5w-Gd-O4w       | 76.7(1)   |
| Gd-O(7)     | 2.417(3)  | O4w-Gd-O(7)      | 76.7(1)   |
| Gd-N(13)    | 2.426(3)  | O(7)-Gd-N(13)    | 81.9(1)   |
| Gd-N(14)    | 2.479(3)  | N(13)-Gd-O1w     | 83.0(1)   |
| Fe-N(11)    | 1.985(2)  | N(13)-Gd-N(14)   | 147.07(9) |
| Fe-N(21)    | 2.012(3)  | N(11)-Fe-C(14)'  | 94.0(1)   |
| Fe-N(12)    | 2.006(3)  | N(11)-Fe-C(13)   | 91.4(1)   |
| Fe-N(22)    | 1.973(3)  | N(22)-Fe-C(13)   | 93.4(1)   |
| Fe-C(13)    | 1.884(3)  | N(22)-Fe-C(14)'  | 92.5(1)   |
| Fe-C(14)'   | 1.903(3)  | N(12)-Fe-C(14)'  | 91.0(1)   |
| Gd-Fe       | 5.2840(5) | N(21)-Fe-C(13)   | 92.9(1)   |
| Gd-Fe'      | 5.4086(6) | N(13)-C(13)-Fe   | 174.6(3)  |
|             |           | N(14)'-C(14)'-Fe | 178.4(3)  |
|             |           | C(13)-N(13)-Gd   | 153.1(2)  |
|             |           | C(14)-N(14)-Gd   | 156.1(2)  |
| <b>2-Eu</b> |           |                  |           |
| Eu-O1w      | 2.411(6)  | O1w-Eu-O2w       | 76.7(2)   |
| Eu-O2w      | 2.412(5)  | O2w-Eu-N(14)     | 77.8(2)   |
| Eu-O3w      | 2.417(6)  | N(14)-Eu-O3w     | 78.4(2)   |
| Eu-O4w      | 2.475(5)  | O3w-Eu-O5w       | 83.7(2)   |
| Eu-O5w      | 2.384(5)  | O5w-Eu-O4w       | 74.6(2)   |
| Eu-O(7)     | 2.424(5)  | O4w-Eu-O(7)      | 76.9(2)   |
| Eu-N(13)    | 2.435(6)  | O(7)-Eu-N(13)    | 81.6(2)   |
| Eu-N(14)    | 2.494(6)  | N(13)-Eu-O1w     | 82.7(2)   |
| Fe-N(11)    | 1.974(5)  | N(13)-Eu-N(14)   | 146.8(2)  |
| Fe-N(21)    | 2.013(6)  | N(11)-Fe-C(14)'  | 94.0(2)   |
| Fe-N(12)    | 2.016(6)  | N(11)-Fe-C(13)   | 91.5(2)   |
| Fe-N(22)    | 1.965(6)  | N(22)-Fe-C(13)   | 93.7(3)   |
| Fe-C(13)    | 1.893(7)  | N(22)-Fe-C(14)'  | 91.9(3)   |
| Fe-C(14)'   | 1.888(7)  | N(12)-Fe-C(14)'  | 91.0(2)   |
| Eu-Fe       | 5.288(1)  | N(21)-Fe-C(13)   | 93.0(2)   |
| Eu-Fe'      | 5.414(1)  | N(13)-C(13)-Fe   | 174.4(6)  |
|             |           | N(14)'-C(14)'-Fe | 177.4(6)  |
|             |           | C(13)-N(13)-Eu   | 153.2(5)  |

|             |          |                  |          |
|-------------|----------|------------------|----------|
|             |          | C(14)-N(14)-Eu   | 155.9(5) |
| <b>2-Er</b> |          |                  |          |
| Er-O1w      | 2.347(7) | O1w-Er-O2w       | 76.5(3)  |
| Er-O2w      | 2.363(7) | O2w-Er-N(14)     | 75.9(3)  |
| Er-O3w      | 2.405(6) | N(14)-Er-O3w     | 81.3(2)  |
| Er-O4w      | 2.425(7) | O3w-Er-O5w       | 84.8(3)  |
| Er-O5w      | 2.347(7) | O5w-Er-O4w       | 74.1(3)  |
| Er-O(7)     | 2.373(7) | O4w-Er-O(7)      | 76.5(3)  |
| Er-N(13)    | 2.361(8) | O(7)-Er-N(13)    | 81.7(3)  |
| Er-N(14)    | 2.416(8) | N(13)-Er-O1w     | 83.7(3)  |
| Fe-N(11)    | 1.970(8) | N(13)-Er-N(14)   | 147.1(3) |
| Fe-N(21)    | 2.025(8) | N(11)-Fe-C(14)'  | 95.1(3)  |
| Fe-N(12)    | 2.002(8) | N(11)-Fe-C(13)   | 93.6(4)  |
| Fe-N(22)    | 1.961(8) | N(22)-Fe-C(13)   | 93.8(4)  |
| Fe-C(13)    | 1.89(1)  | N(22)-Fe-C(14)'  | 91.1(3)  |
| Fe-C(14)'   | 1.93(1)  | N(12)-Fe-C(14)'  | 90.2(3)  |
| Er-Fe       | 5.236(2) | N(21)-Fe-C(13)   | 93.6(3)  |
| Er-Fe'      | 5.364(2) | N(13)-C(13)-Fe   | 174.1(8) |
|             |          | N(14)'-C(14)'-Fe | 174.7(8) |
|             |          | C(13)-N(13)-Er   | 155.4(7) |
|             |          | C(14)-N(14)-Er   | 156.8(7) |

' =  $\frac{1}{2}$ -x;  $\frac{1}{2}$ +y;  $\frac{1}{2}$ -z

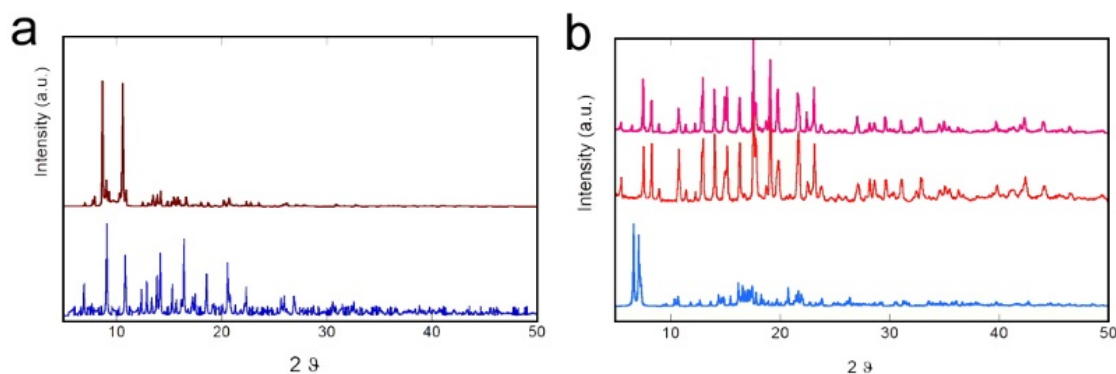

**Figure S5.** Powder-XRD patterns in the  $2\theta$  range from  $5^\circ$  to  $50^\circ$  (Cu  $K\alpha$ ). a) Experimental (above) and simulated (below) patterns of **1-Er**; b) Experimental patterns for **2-Gd** (pink), **2-Eu** (red) and simulated pattern of **2-Eu** (blue). Simulated patterns have been retrieved from single-crystal data. Some deviations of experimental data from the simulated ones in **2-Ln** are attributable to the loss of crystallization solvent over time and upon sample grinding.

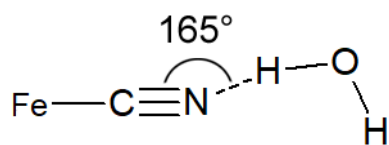

**Figure S6.** Schematic representation of the CN...H angle in  $[\text{Fe}(\text{Phen})_2(\text{CN})_2] \cdot 2\text{H}_2\text{O} \cdot \text{CH}_3\text{CN}$ .

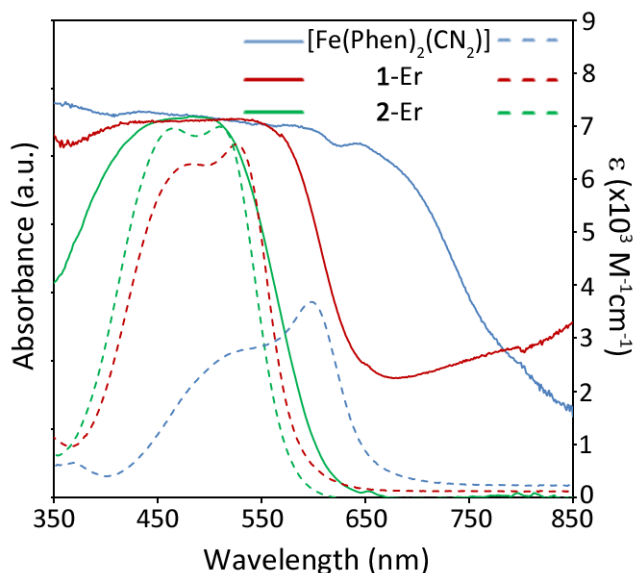

**Figure S7.** Electronic absorption of  $\text{CH}_3\text{CN}$  solutions (dashed lines) and solid-state diffuse reflectance (solid lines) spectra of **1-Er** and **2-Er** compared with the precursor  $[\text{Fe}(\text{Phen})_2(\text{CN})_2]$  complex.

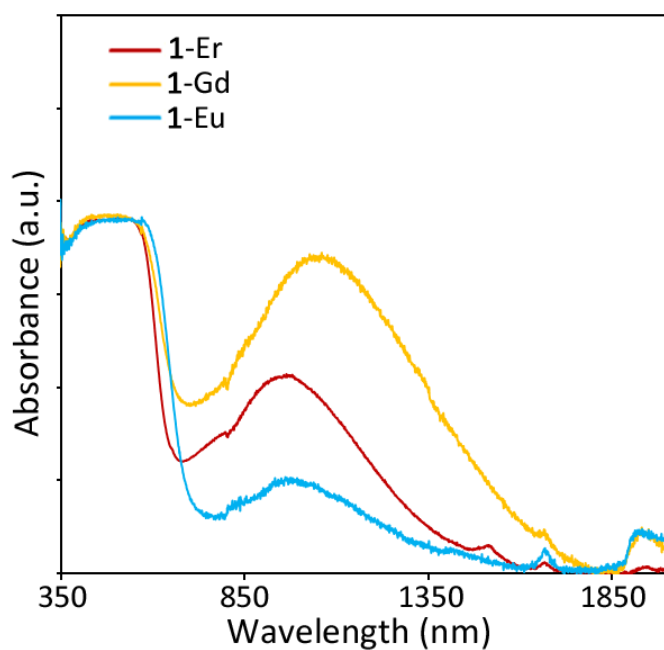

**Figure S8.** Solid-state diffuse reflectance spectra of crystalline samples of **1-Ln** ( $\text{Ln} = \text{Er}, \text{Gd}, \text{Eu}$ ). The spectra are normalized for the absorption maximum in the visible range.

**Table S4.** DFT calculated molecular orbitals of [Fe(phen)<sub>2</sub>CN<sub>2</sub>] (isovalue plot 0.04).

|                 |                                                                                     |                  |                                                                                      |
|-----------------|-------------------------------------------------------------------------------------|------------------|--------------------------------------------------------------------------------------|
| LUMO+5<br>0.17  | 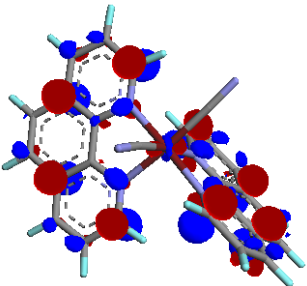   | LUMO+4<br>-0.026 |    |
| LUMO+3<br>-1.09 |    | LUMO+2<br>-1.15  |    |
| LUMO+1<br>-1.34 |   | LUMO<br>-1.38    |   |
| HOMO<br>-6.74   |  | HOMO-1<br>-7.04  |  |
| HOMO-2<br>-7.06 |  | HOMO-3<br>-7.97  |  |
| HOMO-4<br>-8.36 |  | HOMO-5<br>-8.48  |  |



**Table S5.** DFT calculated molecular orbitals of 1-Er (isovalue plot 0.04).

|                 |                                                                                     |                 |                                                                                      |
|-----------------|-------------------------------------------------------------------------------------|-----------------|--------------------------------------------------------------------------------------|
| LUMO+5<br>-1.28 | 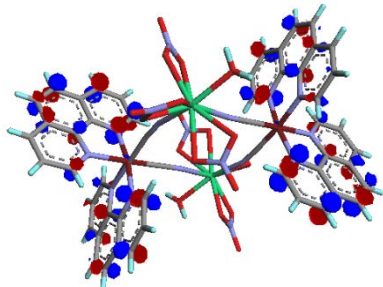   | LUMO+4<br>-1.28 |    |
| LUMO+3<br>-1.52 |    | LUMO+2<br>-1.52 |    |
| LUMO+1<br>-1.58 |   | LUMO<br>-1.58   |   |
| HOMO<br>-7.58   |  | HOMO-1<br>-7.65 |  |
| HOMO-2<br>-7.82 |  | HOMO-3<br>-7.82 |  |
| HOMO-4<br>-7.83 |  | HOMO-5<br>-7.84 |  |

**Table S6.** DFT calculated molecular orbitals of 2-Er (isovalue plot 0.04).

|                   |                                                                                     |                  |                                                                                       |
|-------------------|-------------------------------------------------------------------------------------|------------------|---------------------------------------------------------------------------------------|
| LUMO+3<br>-3.71   | 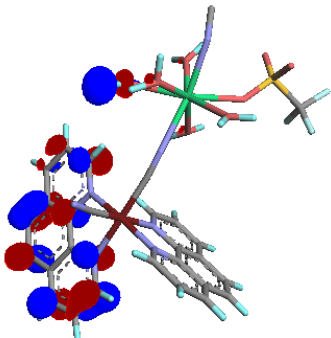   | LUMO+4<br>-3.69  |    |
| LUMO+1<br>-4.10   |    | LUMO+2<br>-3.96  |    |
| HOMO<br>-10.06    |   | LUMO<br>-4.20    |   |
| HOMO-1<br>-10.169 |  | HOMO-2<br>-10.30 |  |
| HOMO-3<br>-10.42  |  | HOMO-4<br>-10.68 |  |
